# Supplementary figures and images for: Nutritional and Feeding Adaptability of Clanis bilineata tsingtauica Larvae to Different Cultivars of Soybean, (Glycine max)
Source: MDPI journal article supplement (doi:10.3390/foods12081721), 2023-04-20

## Supplementary Materials

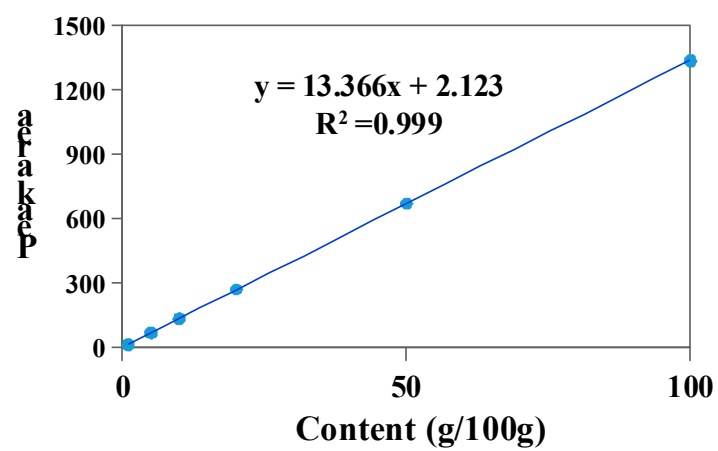

**Figure S1** The standard curve for tryptophan (Trp) measurements

Supplement: s1 [file s1]
